# Supplementary material
Source: PubMed Central journal article supplement (PMC3341072)
Supplement: 1200470109_pnas.201200470SI.pdf [file 1200470109_pnas.201200470SI.pdf]

# Supporting Information

Perera et al. 10.1073/pnas.1200470109

## SI Materials and Methods

**Preparation of NSP4 Inclusion Body Material.** The DNA sequence encoding human neutrophil serine protease 4 (NSP4) was amplified from human bone marrow cDNA using primers DJ2064B 5'-GGCAGATCATATGGAAATCATCGGCGGCCACGAAGTG-ACC-3' and DJ1715 5'-GGGAATTCTTATTAACGACGAAC-CACGTCCCA-3' (Metabion). The PCR product was digested with *Nde* II/*Eco* RI and subcloned into the expression vector pET24c(+) (Novagen). Positive clones were verified by sequence analysis and transformed into the *Escherichia coli* strain B834 (DE3) (Novagen).

Overnight cultures of transformed *E. coli* strain B834 were grown in Luria-Bertani (LB) broth containing 50 µg/mL kanamycin, 2% (wt/vol) glucose, and inoculated in LB/kanamycin without glucose. Expression was induced at an  $A_{600\text{ nm}}$  of 0.5–0.8 by adding isopropyl-1-thio- $\beta$ -D-galactopyranoside to a final concentration of 1 mM. Cultures were grown shaking at 150 rotations per minute at 37 °C for 3–4 h after induction and harvested by centrifugation.

Pelleted bacteria were lysed in 50 mM Tris-HCl, 2 mM MgCl<sub>2</sub> containing 10 µg/mL DNase I and 0.25 mg/mL lysozyme, pH 7.2, by sonification. Inclusion body (IB) material was obtained by centrifugation and two washing steps in 50 mM Tris-HCl, 60 mM EDTA, 1.5 M NaCl, 6% Triton X-100, pH 7.2, and in 50 mM Tris-HCl, 60 mM EDTA, pH 7.2.

Solubilization of IB was performed in an end-over-end rotator in 6 M guanidinium hydrochloride, 100 mM Tris-HCl, 20 mM EDTA, 15 mM GSH, 150 mM GSSG, pH 8.0, overnight at room temperature. Solubilized IB were then dialyzed against 6 M guanidinium hydrochloride, pH 5.0, at 4 °C. Protein concentration was determined by measuring the absorbance at 280 nm (spectrophotometer ND-1000; Peqlab).

## Expression of S-Tag-NSP4 in HEK 293 Cells Using the "Flp-In" System.

The pcDNA5/FRT expression vector (Invitrogen) was complemented by an I $\kappa$ B-chain secretion signal using the oligoduplex DJ2972 5'-Pho-CTAGCCACCATGGAGACAGACACTCC-TGCTATGGGTACTGCTGCTCTGGGTACCAGGTTCCAC-3' and DJ2973 5'-Pho-GTGAACCTGGTACCCAGAGCAGCA-GTACCCATAGCAGGAGTGTGTCTGTCTCCATGGTGG-3' (Metabion), followed by an S-tag peptide using the oligoduplex DJ3151 5'-Pho-GTGAAAGAAACCGCTGCTGCTAAATTCC-AACGCCAGCACATGGACAGCGGAAGCGGTGGACAC-3' and DJ3152 5'-Pho-GTGTCCACCGCTCCGCTGTCATGTGCTGGCGTTCGAATTTAGCAGCAGCGGTTTCTTTCAC-3'. The cDNA-sequence of mature NSP4, starting at the conserved Ile-Ile-Gly-Gly-motif, was amplified from human bone marrow cDNA with DJ3215 5'-TGGACACGTGGATGACGACGACAAGATC-ATCGGGGGCCACGAG-3' and DJ3216 5'-CCCCACCGGTC-TTCCGAACCAGTCCCAGATCCA-3' (Metabion), thereby introducing an enterokinase cleavage site (DDDDK) at the mature amino terminus. The resulting PCR product was digested with *Pml* I/*Age* I and cloned into the reading frames of the N-terminal S-tag and the C-terminal 6xHis-tag of the pcDNA5/FRT vector. The construct was verified by sequence analysis.

HEK 293 cells (Invitrogen) were cultured in DMEM (Life Technologies) supplemented with 10% FCS. One day before transfection,  $1.4 \times 10^6$  flp-in HEK 293 cells were plated in 35-mm cell culture dishes and incubated in 3 mL DMEM containing 10% FCS. Cells were transfected by adding 1.8 mg pOG44 (encoding the flp-in recombinase; Invitrogen) and 0.2 mg pcDNA5/FRT/S-tag-NSP4/H6 in 100 mL serum-free OptiMEM medium and 7 mL FuGENE HD transfection reagent (Roche). Starting at 48 h after

transfection, the medium was replaced with DMEM containing 10% FCS and 75 µg/mL hygromycin B (Invitrogen) every 2–3 d. Two weeks posttransfection, visible circular hygromycin B-resistant colonies were pooled and cultured until a desired number of plates had reached confluence. Expression of recombinant S-tag-NSP4 was tested by Western blot analysis with S-protein conjugated to HRP (Novagen). For protein expression, cells were cultured in DMEM supplemented with 5% FCS and 75 µg/mL hygromycin B for 8–10 d before the supernatant was harvested.

**Purification of S-Tag-NSP4 from HEK 293 Supernatant.** Harvested cell-culture supernatant was filtered through a 0.22-µm membrane (Millipore), concentrated fivefold, and dialyzed against binding buffer (20 mM Na<sub>2</sub>HPO<sub>4</sub>; 500 mM NaCl; 50 mM imidazole, pH 7.5) at 4 °C. The 6xHis-tagged S-tag-NSP4 was purified using nickel-affinity chromatography. The protein solution was applied to a HisTrap HP column (GE Healthcare) previously equilibrated in binding buffer. The column was washed with binding buffer, and bound proteins were eluted applying a linear imidazole gradient from 50 mM to 1 M imidazole in 20 mM Na<sub>2</sub>HPO<sub>4</sub>, 500 mM NaCl, pH 7.5. Fractions were collected and analyzed for S-tag-NSP4 by SDS/PAGE and silver-staining. The expected size is 31 kDa. S-tag-NSP4 containing fractions were pooled and concentrated. Protein concentration was determined by measuring the absorbance at 280 nm.

**Processing of S-Tag-NSP4 by Enterokinase.** Purified S-tag-NSP4 was dialyzed against 20 mM Tris-HCl, 500 mM NaCl, pH 7.4 at 4 °C. After dialysis, CaCl<sub>2</sub> was added to a final concentration of 2 mM. The amino-terminal extension, the S-tag peptide and the enterokinase (EK) recognition sequence, was cleaved off by Tag-Off High Activity Enterokinase (Merck) to generate mature 6xHis-tagged NSP4. EK cleavage was accomplished by 1 U EK per 50 µg S-tag-NSP4 for 16 h at room temperature. Conversion of S-tag-NSP4 was verified by SDS/PAGE and subsequent silver-staining. There is a molecular weight shift of ~3 kDa after removal of the synthetic propeptide. Converted NSP4 was subsequently purified by nickel-affinity chromatography according to the manufacturers' instructions (Ni-NTA; Qiagen).

**Production of Granzymes A, B, K, M, H, and Proteinase 3.** Granzymes (Gzms) A, B, K, M, and H were expressed as inclusion body proteins, refolded and converted into the active mature form as previously reported (1–5). Proteinase 3 (PR3) was produced as described by Korkmaz et al. (6).

**Production of NSP4 Precursor in HEK 293 EBNA Cells.** The DNA sequence encoding the full length reading frame of NSP4 (natural NSP4) was amplified from human bone marrow cDNA using primers DJ539 5'-TCGGCGGCCGACCACGTCACAGATC-CAGG-3' and DJ583 5'-CGGAATTCTGCCATGGGGCTCG-GGTTGA-3' (Metabion). The PCR product was digested with *Eco* RI and the target vector pcDNA3.1 (Invitrogen) was digested with *Bsp* 120I, complemented by the Klenow enzyme and subsequently digested with *Eco* RI. After subcloning in frame with the C-terminal cMyc-6xHis-tag, positive clones were verified by sequence analysis.

The HEK 293 cell line stably expressing Epstein-Barr virus nuclear antigen-1 (HEK293E) was grown as suspension culture in Freestyle 293 Expression Medium (Invitrogen), supplemented with 0.1% Pluronic F-68, 25 µg/mL Geneticin G418 and 0.5% Bacto TC Lactalbumin Hydrolysate. Before transfection of HEK293E with natural NSP4, cells were brought to  $1 \times 10^6$  cells/mL. Poly-

ethylene imine (PEI)/DNA complexes were prepared by adding PEI to DNA, both prediluted in Optipro serum free medium (Invitrogen) and incubation for 15 min at room temperature before adding to cell culture. Per 1 mL cell culture, 2  $\mu$ g PEI and 1  $\mu$ g DNA were used.

Cell culture supernatant was harvested after 72–96 h by 10-min centrifugation at  $1,000 \times g$  and purified as described above for S-tag-NSP4.

**ELISA.** The specificity of anti-NSP4 positive mAbs was tested in ELISA by coating 1  $\mu$ g NSP4 IB material or 100 ng per well of each of the Gzms A, B, K, M, H, neutrophil elastase (NE), cathepsin G (CG), PR3, azurocidin (AZU), and native NSP4 produced in HEK 293. NE, AZU, and CG were purchased from Elastin products, Sigma-Aldrich, and Calbiochem, respectively. Hybridoma culture supernatants were diluted 1:20 and bound mAbs were detected with HRP-labeled goat anti-rat IgG+IgM antibodies diluted 1:4,000 (112-035-068; Jackson Immunoresearch).

**Isolation of Different Blood Cell Populations and Preparation of Total Cell Lysates.** Peripheral blood mononuclear cells (PBMCs) and polymorphonuclear cells (PMNs) were obtained by Ficoll gradient centrifugation. Residual erythrocytes were removed by dextran sedimentation and hypertonic treatment. For total cell lysates, cells were taken in 50 mM Tris/HCl, 150 mM NaCl, 0.5 mM EDTA, 1 mM PMSF, 0.5% Nonidet P-40, pH 7.4, incubated on ice for 20 min, and underwent  $4 \times 30$  s ultrasonication (Sonorex TK52; Bandelin Electronic). Cell debris and DNA were pelleted by centrifugation for 10 min at  $20,000 \times g$  and  $4^\circ\text{C}$ .

**SDS/PAGE and Immunoblotting.** To examine the specificity of the developed rat mAbs in immunoblotting, 100 ng of each tested protein was separated by reducing SDS/PAGE and analyzed by silver-staining and immunoblotting. For the latter, proteins were transferred to a Hybond-ECL membrane (GE Healthcare) and

probed with the mAbs against NSP4 (1:30) and HRP-labeled goat anti-rat antibodies (Jackson Immunoresearch) in a dilution of 1:10,000.

Total cell lysates of isolated PBMCs or PMNs were resolved by reducing SDS/PAGE and analyzed by Western blotting, as described above, using anti-NSP4 mAbs.

**Immunohistochemistry.** Formalin-fixed, paraffin-embedded human tissue samples from bone marrow, lymph node, spleen, neural network, pancreas, prostate, and arteries were routinely embedded for light microscopy and sectioned into 2- $\mu$ m slides. Immunostaining was carried out after antigen retrieval by microwaving in citrate buffer ( $3 \times 5$  min, 600 W) after dewaxing of the sections. The rat hybridoma supernatants were diluted 1:30 and incubated with the sections overnight at  $4^\circ\text{C}$ . Negative control slides were stained in parallel omitting the incubation with primary antibodies. Slides were developed using the Ultravision LP staining kit (Thermo Fisher Scientific). Sections were counterstained with hematoxylin.

**Conversion of NSP4 Precursor by Dipeptidyl Peptidase I.** Dipeptidyl peptidase I (DPPI) was first activated at  $37^\circ\text{C}$  in 50 mM sodium acetate, 100 mM NaCl, 1 mM dithioerythritol (DTE), pH 5.5 for 60 min. NSP4 precursor was incubated with 0.5 U/mg activated DPPI in 50 mM sodium acetate, 100 mM NaCl, pH 5.5 for 4 h at room temperature.

**Edman Sequencing.** Ten micrograms of NSP4 precursor before and after incubation with DPPI was separated by reducing SDS/PAGE and transferred to Immobilon-P transfer membrane (Millipore) in 90 mM Tris-borate, 1 mM EDTA, and 10% methanol. Membrane was stained with Coomassie blue and the bands representing NSP4 were analyzed by N-terminal Edman sequencing according to standard procedure.

1. Andrade F, Fellows E, Jenne DE, Rosen A, Young CS (2007) Granzyme H destroys the function of critical adenoviral proteins required for viral DNA replication and granzyme B inhibition. *EMBO J* 26:2148–2157.
2. Fellows E, Gil-Parrado S, Jenne DE, Kurschus FC (2007) Natural killer cell-derived human granzyme H induces an alternative, caspase-independent cell-death program. *Blood* 110:544–552.
3. Hink-Schauer C, Estébanez-Perpiñá E, Kurschus FC, Bode W, Jenne DE (2003) Crystal structure of the apoptosis-inducing human granzyme A dimer. *Nat Struct Biol* 10:535–540.

4. Kurschus FC, et al. (2004) Killing of target cells by redirected granzyme B in the absence of perforin. *FEBS Lett* 562:87–92.
5. Wilharm E, et al. (1999) Generation of catalytically active granzyme K from *Escherichia coli* inclusion bodies and identification of efficient granzyme K inhibitors in human plasma. *J Biol Chem* 274:27331–27337.
6. Korkmaz B, Kuhl A, Bayat B, Santoso S, Jenne DE (2008) A hydrophobic patch on proteinase 3, the target of autoantibodies in Wegener granulomatosis, mediates membrane binding via NB1 receptors. *J Biol Chem* 283:35976–35982.

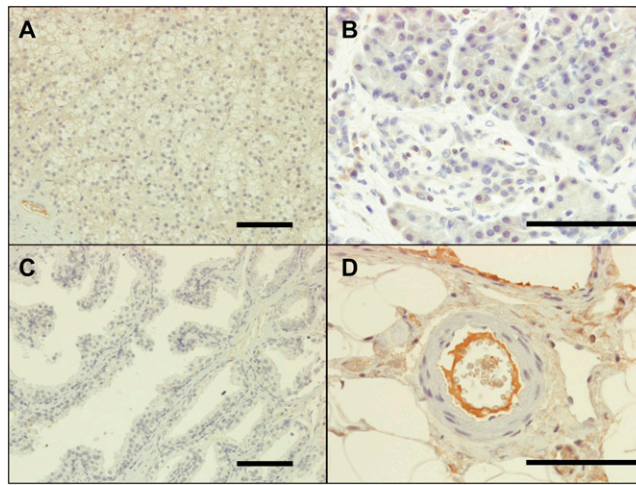

**Fig. S1.** NSP4 protein expression screen. Staining of different human tissue samples using anti-NSP4 mAbs and the Ultravision LP staining kit. NSP4 was not detected in (A) neural network, (B) pancreas, (C) prostate, or (D) arteries. (Scale bars, 100  $\mu\text{m}$ .)

**Table S1. NSP4 cleavage sites from a chymotryptic peptide library**

| Nonprime sequence<br>(inferred from database) | Prime-side sequence<br>(LC-MS/MS) | PeptideProphet<br>probability score | X!Tandem<br>hyperscore | Mass<br>accuracy<br>(ppm) | Neutral<br>mass (Da) | Exemplary<br>protein<br>accession | Discarded from<br>PICS profile |
|-----------------------------------------------|-----------------------------------|-------------------------------------|------------------------|---------------------------|----------------------|-----------------------------------|--------------------------------|
| QFDAAVPEV                                     | AAQKAPASP                         | 0.86                                | 25.6                   | -0.7                      | 955.5                | 17888                             |                                |
| YHGRVQALAD                                    | AAREAGLQF                         | 0.96                                | 25.2                   | 0.6                       | 1049.5               | 17897                             |                                |
| AHEAGEFFMR                                    | AGSATVRPTEGAGGTL                  | 1.00                                | 45.5                   | -0.3                      | 1531.7               | 17875                             |                                |
| AHEAGEFFMR                                    | AGSATVRPTEGAGGTL                  | 1.00                                | 45.6                   | -1.5                      | 1531.7               | 17875                             |                                |
| GAVIAYEPVW                                    | AIGTGKSATPAQAQAVH                 | 1.00                                | 52.6                   | -0.8                      | 1722.9               | 17903                             |                                |
| GAVIAYEPVW                                    | AIGTGKSATPAQAQAVH                 | 1.00                                | 49.6                   | -1.7                      | 1722.9               | 17903                             |                                |
| NFNVPFVVVR                                    | AISDVADQQSHL                      | 1.00                                | 50.3                   | -0.9                      | 1370.6               | 17863                             |                                |
| NFNVPFVVVR                                    | AISDVADQQSHL                      | 1.00                                | 53.9                   | -1.3                      | 1370.6               | 17863                             |                                |
| MSFELPALPY                                    | AKDALAPH                          | 0.97                                | 32.1                   | -0.7                      | 937.5                | 17879                             | X                              |
| MSFELPALPY                                    | AKDALAPH                          | 0.99                                | 29.3                   | -2.2                      | 937.5                | 17879                             | X                              |
| KLDLERTVIR                                    | APADGWVTNL                        | 0.84                                | 26.8                   | 2.0                       | 1130.5               | 17896                             |                                |
| LAVDESFQPT                                    | AVGFAEALNNKDKPE                   | 1.00                                | 45.9                   | 2.2                       | 1745.9               | 17899                             |                                |
| LCRNCKIVKR                                    | DGVIRVIC                          | 0.85                                | 31.6                   | -0.9                      | 1018.5               | 17896                             |                                |
| SLXGTIIIVGR                                   | DIAHAKL                           | 0.96                                | 36.5                   | -0.5                      | 882.5                | 17878                             |                                |
| SLXGTIIIVGR                                   | DIAHAKL                           | 0.83                                | 34.3                   | -0.2                      | 882.5                | 17878                             |                                |
| KLTKRMRVIR                                    | EKVDATKQY                         | 1.00                                | 35.7                   | -0.9                      | 1224.6               | 17904                             |                                |
| KLTKRMRVIR                                    | EKVDATKQY                         | 0.99                                | 32.8                   | -1.1                      | 1224.6               | 17904                             |                                |
| NNPFFVSLKD                                    | GAQKEADKLG Y                      | 0.95                                | 38.2                   | -0.3                      | 1322.7               | 17901                             |                                |
| NNPFFVSLKD                                    | GAQKEADKLG Y                      | 0.97                                | 38.1                   | -0.5                      | 1322.7               | 17901                             |                                |
| GIANTFIAAQ                                    | GHDVGKSLY                         | 0.82                                | 29.7                   | 1.7                       | 1090.5               | 17892                             |                                |
| KPEDAVLDVQ                                    | GIATVTPAIVQ                       | 0.97                                | 41.8                   | -1.2                      | 1156.6               | 17899                             |                                |
| KPEDAVLDVQ                                    | GIATVTPAIVQ                       | 0.97                                | 38.1                   | -0.9                      | 1156.6               | 17899                             |                                |
| KPEDAVLDVQ                                    | GIATVTPAIVQAC                     | 0.90                                | 35                     | -3.0                      | 1387.7               | 17899                             |                                |
| GQNVFEFIQD                                    | GQKGPAAVNVTAI                     | 0.90                                | 27.1                   | -2.2                      | 1340.7               | 17881                             |                                |
| HVIAGKAVAL                                    | KEAMEPEFKTY                       | 0.85                                | 36.9                   | -2.1                      | 1515.7               | 17889                             | X                              |
| SGVRAIDTKC                                    | KIEQAPGQH                         | 0.99                                | 28.1                   | -0.9                      | 1122.5               | 17896                             |                                |
| PDEGI PAVCF                                   | KLKDGEDPGY                        | 0.99                                | 27.9                   | -0.8                      | 1264.6               | 17877                             | X                              |
| PDEGI PAVCF                                   | KLKDGEDPGY                        | 0.94                                | 31.1                   | -2.7                      | 1264.6               | 17877                             | X                              |
| PDEGI PAVCF                                   | KLKDGEDPGY                        | 0.97                                | 30.8                   | -2.6                      | 1264.6               | 17877                             | X                              |
| KNPQKNLYTF                                    | KNQASNDLPN                        | 1.00                                | 24.6                   | -1.1                      | 1215.6               | 87082                             | X                              |
| KNPQKNLYTF                                    | KNQASNDLPN                        | 0.97                                | 19.9                   | -1.1                      | 1215.6               | 87082                             | X                              |
| SGGAGIQADL                                    | KTF S ALGAY                       | 0.81                                | 30.9                   | -7.4                      | 1072.5               | 17884                             | X                              |
| MVEVFLERGY                                    | KV VSGTDNH LF                     | 0.99                                | 41.4                   | -0.6                      | 1388.7               | 17889                             | X                              |
| AKSVKFKYPR                                    | QRKTVVADGVGQGY                    | 0.93                                | 29.2                   | -3.0                      | 1592.8               | 17863                             |                                |
| WRQKTGRAR                                     | SGSIKSPIW                         | 0.89                                | 30.7                   | 0.0                       | 1089.6               | 17897                             |                                |
| ARPLLVISR                                     | SHADAE LKEY                       | 1.00                                | 42.2                   | -2.0                      | 1277.6               | 17906                             |                                |
| ARPLLVISR                                     | SHADAE LKEY                       | 1.00                                | 42.1                   | -2.0                      | 1277.6               | 17906                             |                                |
| KEASAGKLVR                                    | T LAAVRDAKEAA                     | 1.00                                | 42.3                   | -1.9                      | 1330.7               | 17904                             |                                |
| KEASAGKLVR                                    | T LAAVRDAKEAA                     | 1.00                                | 39.5                   | -1.0                      | 1330.7               | 17904                             |                                |
| LSQYDFPGDD                                    | TPIVRGSAL                         | 0.97                                | 31                     | -1.0                      | 1000.5               | 17897                             |                                |
| RDXXGAVASL                                    | TSVAKLFF                          | 0.83                                | 24.9                   | 0.5                       | 977.5                | 17871                             | X                              |
| VVNTIRGIVK                                    | VAAVKAPGF                         | 1.00                                | 41.8                   | -1.2                      | 974.5                | 17905                             |                                |
| KHLPEPFRIR                                    | VIEPVKR                           | 0.91                                | 41.5                   | 1.3                       | 955.6                | 87082                             |                                |
| KHLPEPFRIR                                    | VIEPVKR                           | 0.98                                | 41.7                   | -0.7                      | 955.6                | 87082                             |                                |
| DIVWDFRLPR                                    | VKSISASGH                         | 0.98                                | 33.5                   | -1.4                      | 1000.5               | 17877                             |                                |
| MSTAKL                                        | VKSKATNLLY                        | 0.99                                | 27.3                   | -0.6                      | 1279.7               | 17870                             | X                              |
| CKPTSPGRRH                                    | VVKVVNPELH                        | 0.96                                | 29.1                   | -1.9                      | 1248.7               | 17897                             |                                |
| CKPTSPGRRH                                    | VVKVVNPELH                        | 0.94                                | 29.4                   | -1.0                      | 1248.7               | 17897                             |                                |

Nonprime-side sequences are reported up to the position P10. X denotes ambiguous nonprime side residues. A small number of cleavage sites have P1 residues, which correspond to a potential cleavage-site of the digestion protease used for library generation. These cases might be related to incomplete amine protection during library preparation. Hence, prime-side cleavage products with such amino-termini are omitted from the proteomic identification of protease cleavage sites (PICS) analysis, as well as prime-side cleavage products with amino termini that correspond to a protein amino terminus. One exemplary protein is stated for each identified peptide sequence. X!Tandem was applied to assign peptides to tandem mass spectra and the X!Tandem hyperscore is reported together with the PeptideProphet probability score. C signifies carboxyamidomethylated cysteine and K signifies di-methylated lysine. Some peptides were identified repeatedly by LC-MS/MS; however, the set of sequences was rendered nonredundant before analysis in the form of sequence logos.

**Table S2. NSP4 cleavage sites from a GluC peptide library**

| Nonprime sequence (inferred from database) | Prime-side sequence (LC-MS/MS) | PeptideProphet probability score | X!Tandem hyperscore | Mass accuracy (ppm) | Neutral mass (Da) | Exemplary protein accession | Discarded from PICS profile |
|--------------------------------------------|--------------------------------|----------------------------------|---------------------|---------------------|-------------------|-----------------------------|-----------------------------|
| GYTLNGRTIR                                 | AAMVTVAKAKA                    | 1.00                             | 43.6                | -2.3                | 1203.7            | 17889                       |                             |
| GYTLNGRTIR                                 | AAMVTVAKAKA                    | 1.00                             | 50.5                | -1.6                | 1203.7            | 17889                       |                             |
| KYYDPRVWLR                                 | AGQTSMIARLE                    | 0.93                             | 37.1                | -0.6                | 1263.6            | 17892                       |                             |
| KYYDPRVWLR                                 | AGQTSMIARLE                    | 1.00                             | 48.2                | -0.2                | 1263.6            | 17892                       |                             |
| KYYDPRVWLR                                 | AGQTSMIARLE                    | 0.97                             | 40.8                | -0.6                | 1263.6            | 17892                       |                             |
| SQASDSYYR                                  | AKQAVYR                        | 0.78                             | 25.4                | -1.4                | 950.5             | 17886                       |                             |
| PFLEHDDANR                                 | ALMGANMQR                      | 0.99                             | 38                  | -0.7                | 1078.5            | 17904                       |                             |
| PFLEHDDANR                                 | ALMGANMQR                      | 1.00                             | 41.9                | -2.1                | 1078.5            | 17904                       |                             |
| FQPTAVGFAE                                 | ALNNKDKPE                      | 0.80                             | 37.3                | -0.6                | 1171.6            | 17899                       | X                           |
| KLEHAVPMAK                                 | ALVAGGVRVLE                    | 1.00                             | 38                  | -2.8                | 1170.6            | 17881                       |                             |
| KLEHAVPMAK                                 | ALVAGGVRVLE                    | 1.00                             | 49.3                | -0.4                | 1170.6            | 17881                       |                             |
| APDQTTTIVR                                 | ANSSTTTAAEPLKM                 | 0.93                             | 30.3                | -0.8                | 1536.7            | 17886                       |                             |
| APDQTTTIVR                                 | ANSSTTTAAEPLKM                 | 0.96                             | 37                  | -1.0                | 1536.7            | 17886                       |                             |
| LAVDESFQPT                                 | AVGFAEALNNKDKPE                | 1.00                             | 53.5                | 0.0                 | 1745.9            | 17899                       |                             |
| HVSPGALDAE                                 | AYGVKSTIED                     | 1.00                             | 35.1                | 7.3                 | 1197.6            | 17905                       | X                           |
| GCVELVQPGG                                 | FDELVQIYE                      | 0.91                             | 27.5                | 0.5                 | 1242.5            | 14569                       |                             |
| VALKEAMEPE                                 | FKTYQQQVAK                     | 1.00                             | 33.1                | 0.4                 | 1383.7            | 17889                       | X                           |
| LVVSTLNNPF                                 | FVSLKDGAKQE                    | 1.00                             | 46.1                | -4.4                | 1364.7            | 17901                       |                             |
| LVVSTLNNPF                                 | FVSLKDGAKQE                    | 1.00                             | 42.3                | -3.6                | 1364.7            | 17901                       |                             |
| LTASTVIQYR                                 | GAIIPREMPA                     | 0.96                             | 29.6                | -0.5                | 1212.6            | 87082                       |                             |
| ESGVLNQOPY                                 | GFNTRFE                        | 0.76                             | 23.4                | -2.2                | 957.4             | 17877                       |                             |
| ESGVLNQOPY                                 | GFNTRFE                        | 1.00                             | 27.3                | 0.3                 | 957.4             | 17877                       |                             |
| GNGDCHIILR                                 | GGKEPNYSAK                     | 0.90                             | 30.1                | -1.5                | 1193.6            | 17869                       |                             |
| GNGDCHIILR                                 | GGKEPNYSAK                     | 0.97                             | 33.3                | 0.3                 | 1193.6            | 17869                       |                             |
| TTHKTLAGPR                                 | GGLILAKGGSEE                   | 1.00                             | 37.2                | -0.4                | 1245.6            | 17889                       |                             |
| TTHKTLAGPR                                 | GGLILAKGGSEE                   | 1.00                             | 37.4                | -0.5                | 1245.6            | 17889                       |                             |
| TEEYGNMIDM                                 | GILDPTKVTR                     | 0.97                             | 43.4                | -1.5                | 1214.7            | 17905                       |                             |
| TEEYGNMIDM                                 | GILDPTKVTR                     | 0.82                             | 36.2                | -2.5                | 1214.7            | 17905                       |                             |
| GAILVVAATD                                 | GPMPQTR                        | 0.99                             | 34.8                | 0.3                 | 1002.4            | 17897                       |                             |
| YTSPRVMQAQ                                 | GSQLTNKYAE                     | 0.93                             | 29.5                | -0.9                | 1225.6            | 17889                       |                             |
| IEDVFSISGR                                 | GTVVTRVE                       | 0.97                             | 38                  | -1.3                | 1004.5            | 17897                       |                             |
| IEDVFSISGR                                 | GTVVTRVE                       | 0.96                             | 41.7                | -2.4                | 1004.5            | 17897                       |                             |
| ARGAIFGLTR                                 | GVNANHIIIR                     | 0.82                             | 38.9                | -2.3                | 1080.5            | 17903                       |                             |
| ARGAIFGLTR                                 | GVNANHIIIR                     | 1.00                             | 50.6                | -1.4                | 1080.5            | 17903                       |                             |
| GDGVGMAIRA                                 | GVPVQDM                        | 0.80                             | 22.6                | -1.6                | 832.3             | 17869                       |                             |
| QLQQVLMMSR                                 | HNLRAPLANNGSVLE                | 0.75                             | 37.4                | 1.9                 | 1691.8            | 17872                       |                             |
| QLQQVLMMSR                                 | HNLRAPLANNGSVLE                | 1.00                             | 52.6                | 1.0                 | 1691.8            | 17872                       |                             |
| SNYFFDTTQG                                 | HSQINGCTVR                     | 0.77                             | 25.4                | -0.8                | 1258.6            | 87082                       |                             |
| IVGGGIANTF                                 | IAAQGHVGVKSLYE                 | 0.99                             | 38.6                | 0.4                 | 1602.8            | 17892                       |                             |
| IVGGGIANTF                                 | IAAQGHVGVKSLYE                 | 1.00                             | 38.8                | -0.1                | 1602.8            | 17892                       |                             |
| WWMLHEETVY                                 | KGGDTVILNE                     | 0.75                             | 28.5                | -0.9                | 1148.5            | 87082                       |                             |
| GKSASAKSLF                                 | KLQTLGLTQ                      | 1.00                             | 35.2                | -1.1                | 1116.6            | 17887                       |                             |
| GKSASAKSLF                                 | KLQTLGLTQ                      | 1.00                             | 31.7                | -0.8                | 1116.6            | 17887                       |                             |
| KNPQKNLYTF                                 | KNQASNDLPN                     | 1.00                             | 33.4                | -1.6                | 1215.6            | 87082                       |                             |
| KNPQKNLYTF                                 | KNQASNDLPN                     | 0.99                             | 21.7                | -2.3                | 1215.6            | 87082                       |                             |
| KNPQKNLYTF                                 | KNQASNDLPN                     | 1.00                             | 30                  | -1.4                | 1215.6            | 87082                       |                             |
| VYIEGQLRTR                                 | KWTDQSGQDRYTTE                 | 1.00                             | 38.5                | -0.3                | 1829.8            | 17904                       |                             |
| VYIEGQLRTR                                 | KWTDQSGQDRYTTE                 | 1.00                             | 42                  | 0.4                 | 1829.8            | 17904                       |                             |
| ETGYSNKVLD                                 | LIAHISK                        | 0.91                             | 34.5                | -0.8                | 896.5             | 17880                       |                             |
| QKEADKLGYN                                 | LVVLDSQNNPAKE                  | 1.00                             | 37.5                | -0.7                | 1541.8            | 17901                       |                             |
| SNYQSPMVR                                  | MMKADAAPVSAQE                  | 0.99                             | 35.2                | 1.5                 | 1463.6            | 17892                       |                             |
| SNYQSPMVR                                  | MMKADAAPVSAQE                  | 1.00                             | 35                  | 0.0                 | 1463.6            | 17892                       |                             |
| AQKEADKLG                                  | NLVVLDSQNNPAKE                 | 0.95                             | 37.6                | 0.9                 | 1655.8            | 17901                       |                             |
| AQKEADKLG                                  | NLVVLDSQNNPAKE                 | 1.00                             | 37.9                | -0.2                | 1655.8            | 17901                       |                             |
| AQKEADKLG                                  | NLVVLDSQNNPAKE                 | 1.00                             | 44.7                | -0.2                | 1655.8            | 17901                       |                             |
| KDPLDNTYTR                                 | NMYIVKH                        | 0.99                             | 32                  | -0.6                | 1019.5            | 17874                       |                             |
| KDPLDNTYTR                                 | NMYIVKH                        | 1.00                             | 28.4                | -0.1                | 1019.5            | 17874                       |                             |
| AESVKNIIFY                                 | QYTIPTHQGRGAE                  | 0.95                             | 35.1                | -0.3                | 1544.7            | 87082                       |                             |
| AESVKNIIFY                                 | QYTIPTHQGRGAE                  | 1.00                             | 39.2                | -0.9                | 1544.7            | 87082                       |                             |
| GINCNLTLLF                                 | SFAQARACAE                     | 1.00                             | 31.2                | -2.7                | 1197.5            | 17861                       |                             |





Table S3. NSP4 cleavage sites from a tryptic peptide library

| Nonprime sequence (inferred from database) | Prime-side sequence (LC-MS/MS) | PeptideProphet probability score | X!Tandem hyperscore | Mass accuracy (ppm) | Neutral mass (Da) | Exemplary protein accession | Discarded from PICS profile |
|--------------------------------------------|--------------------------------|----------------------------------|---------------------|---------------------|-------------------|-----------------------------|-----------------------------|
| VHLEGGFVGM                                 | AAAPSGASTGSR                   | 1.00                             | 58.1                | 1.0                 | 1119.5            | 17891                       |                             |
| VHLEGGFVGM                                 | AAAPSGASTGSR                   | 1.00                             | 55                  | -0.5                | 1119.5            | 17891                       |                             |
| EEAEKITTVO                                 | AAIDYINGHQA                    | 1.00                             | 41.7                | 0.5                 | 1259.6            | 17873                       |                             |
| EEAEKITTVO                                 | AAIDYINGHQA                    | 1.00                             | 45.3                | -1.5                | 1259.6            | 17873                       |                             |
| HLEGGFVGM                                  | AAPSGASTGSR                    | 0.98                             | 33                  | -0.5                | 1048.5            | 17891                       |                             |
| LEEIGVVCQQ                                 | AGGHAAFVDAGK                   | 1.00                             | 57.2                | -2.8                | 1215.6            | 87082                       |                             |
| LEEIGVVCQQ                                 | AGGHAAFVDAGK                   | 1.00                             | 53.8                | -0.5                | 1215.6            | 87082                       |                             |
| EWAKHNINVN                                 | AIAPGYMATNNTQQLR               | 1.00                             | 77.6                | 0.4                 | 1835.9            | 17892                       |                             |
| EWAKHNINVN                                 | AIAPGYMATNNTQQLR               | 1.00                             | 49.6                | -3.1                | 1835.9            | 17892                       |                             |
| VDHGKTTLTA                                 | AITTVLAK                       | 0.65                             | 33                  | -1.4                | 931.5             | 17897                       |                             |
| VDHGKTTLTA                                 | AITTVLAK                       | 0.85                             | 32.8                | -7.5                | 931.5             | 17897                       |                             |
| HIPADQFPAQ                                 | ALACELYK                       | 0.74                             | 39.1                | -1.9                | 1082.5            | 87082                       |                             |
| HIPADQFPAQ                                 | ALACELYK                       | 0.99                             | 37.9                | -0.4                | 1082.5            | 87082                       |                             |
| HIPADQFPAQ                                 | ALACELYK                       | 1.00                             | 41.8                | 0.2                 | 1082.5            | 87082                       |                             |
| EVMGGLGGFG                                 | ALCALPQK                       | 0.81                             | 30.8                | -3.3                | 1015.5            | 17888                       |                             |
| GDGTTTATVL                                 | AQAIITEGLK                     | 0.90                             | 45.5                | -0.1                | 1158.6            | 17905                       |                             |
| GDGTTTATVL                                 | AQAIITEGLK                     | 0.83                             | 49.5                | 4.0                 | 1158.6            | 17905                       |                             |
| LAVDESFQPT                                 | AVGFAEALNNK                    | 1.00                             | 49.6                | 2.3                 | 1248.6            | 17899                       |                             |
| LAVDESFQPT                                 | AVGFAEALNNK                    | 0.99                             | 45.4                | 0.6                 | 1248.6            | 17899                       |                             |
| LAVDESFQPT                                 | AVGFAEALNNKDKPE                | 1.00                             | 53.4                | 0.4                 | 1745.9            | 17899                       |                             |
| LAVDESFQPT                                 | AVGFAEALNNKDKPE                | 1.00                             | 57.1                | 0.4                 | 1745.9            | 17899                       |                             |
| NPDEAVAIGA                                 | AVQGGVLTGDVK                   | 1.00                             | 61.9                | -1.8                | 1258.7            | 17861                       |                             |
| DLNPKAMTPV                                 | AWWMLHEE                       | 1.00                             | 38                  | 0.0                 | 1188.5            | 87082                       |                             |
| KVQNASYQVA                                 | AYLADEIAK                      | 1.00                             | 41.7                | -1.1                | 1108.5            | 17877                       |                             |
| KVQNASYQVA                                 | AYLADEIAK                      | 0.84                             | 35.2                | 0.1                 | 1108.5            | 17877                       |                             |
| GTNTIGSSEA                                 | CMLGGMAMK                      | 1.00                             | 44.8                | 0.4                 | 1113.5            | 17877                       |                             |
| GTNTIGSSEA                                 | CMLGGMAMK                      | 1.00                             | 37.9                | -3.0                | 1113.5            | 17877                       |                             |
| TPTRHYAHVD                                 | CPGHADYVK                      | 1.00                             | 42.4                | -4.3                | 1161.5            | 17897                       |                             |
| TPTRHYAHVD                                 | CPGHADYVK                      | 1.00                             | 42.5                | -1.7                | 1161.5            | 17897                       |                             |
| GNARQNLATF                                 | CQTWDDENVHK                    | 1.00                             | 45.2                | -3.1                | 1546.6            | 17877                       |                             |
| GNARQNLATF                                 | CQTWDDENVHK                    | 1.00                             | 51.6                | -1.4                | 1546.6            | 17877                       |                             |
| DYDRITKLAR                                 | EAVEGAKL                       | 0.99                             | 31                  | -0.5                | 931.5             | 17881                       | X                           |
| DYDRITKLAR                                 | EAVEGAKL                       | 1.00                             | 37.8                | -2.1                | 931.5             | 17881                       | X                           |
| ESKKGYNLSL                                 | GALTGGQALQQAQK                 | 1.00                             | 65.8                | -2.1                | 1357.7            | 17904                       |                             |
| ESKKGYNLSL                                 | GALTGGQALQQAQK                 | 1.00                             | 65.8                | -1.6                | 1357.7            | 17904                       |                             |
| VDESFQPTAV                                 | GFAEALNNKDKPE                  | 0.97                             | 41.7                | 2.7                 | 1575.8            | 17899                       |                             |
| VDESFQPTAV                                 | GFAEALNNKDKPE                  | 0.87                             | 45.9                | 0.9                 | 1575.8            | 17899                       |                             |
| APAELLFEEF                                 | GFTVDNVVAK                     | 1.00                             | 38                  | -0.9                | 1164.6            | 48994                       |                             |
| APAELLFEEF                                 | GFTVDNVVAK                     | 1.00                             | 41.1                | -1.6                | 1164.6            | 48994                       |                             |
| KTDQKVVVTL                                 | GFVESQAQAEAAVK                 | 1.00                             | 49.6                | -0.8                | 1607.7            | 17908                       |                             |
| KTDQKVVVTL                                 | GFVESQAQAEAAVK                 | 1.00                             | 57.3                | 2.7                 | 1607.7            | 17908                       |                             |
| RGWQVPAFTL                                 | GGEATDIVVMR                    | 0.99                             | 38                  | 0.6                 | 1234.6            | 17877                       |                             |
| RGWQVPAFTL                                 | GGEATDIVVMR                    | 1.00                             | 41.9                | -0.4                | 1234.6            | 17877                       |                             |
| EAVAIGAAVQ                                 | GGVLTGDVK                      | 0.90                             | 38.3                | -1.1                | 960.5             | 17861                       |                             |
| KYLSDHPKLQ                                 | GIAQQNSFK                      | 0.88                             | 35.2                | 4.7                 | 1107.5            | 17877                       |                             |
| KPEDAVLDVQ                                 | GIATVTPAIVQACTQDK              | 1.00                             | 45.7                | -2.5                | 1888.0            | 17899                       |                             |
| KPEDAVLDVQ                                 | GIATVTPAIVQACTQDK              | 1.00                             | 57.1                | -0.7                | 1887.9            | 17899                       |                             |
| KPEDAVLDVQ                                 | GIATVTPAIVQACTQDK              | 1.00                             | 53.3                | -1.6                | 1887.9            | 17899                       |                             |
| VGVDVVAEAT                                 | GLFLTDEAR                      | 0.78                             | 29.1                | -1.7                | 1209.6            | 17880                       |                             |
| VGVDVVAEAT                                 | GLFLTDEAR                      | 1.00                             | 42.7                | 3.7                 | 1209.6            | 17880                       |                             |
| YLFVDMAHVA                                 | GLVAAGVYPNPVPH                 | 1.00                             | 54.2                | 3.4                 | 1477.7            | 17889                       |                             |
| YLFVDMAHVA                                 | GLVAAGVYPNPVPH                 | 1.00                             | 50.1                | 0.0                 | 1477.7            | 17889                       |                             |
| ITEGLKAVAA                                 | GMNPMDLK                       | 0.98                             | 36.5                | 1.3                 | 1020.4            | 17905                       |                             |
| ITEGLKAVAA                                 | GMNPMDLK                       | 0.95                             | 36.5                | -2.6                | 1020.4            | 17905                       |                             |
| CIAAGIASLW                                 | GPAHGGANEAAALK                 | 1.00                             | 72                  | -1.8                | 1307.6            | 17869                       |                             |
| CIAAGIASLW                                 | GPAHGGANEAAALK                 | 1.00                             | 75.9                | -0.9                | 1307.6            | 17869                       |                             |
| NAAADLAAIS                                 | GQKPLITK                       | 0.77                             | 23.1                | -3.5                | 1027.6            | 17897                       |                             |
| KLGPYEFICT                                 | GRPDEGIPAVCFK                  | 0.83                             | 36.6                | -2.5                | 1560.7            | 17877                       |                             |
| KLGPYEFICT                                 | GRPDEGIPAVCFK                  | 1.00                             | 39.7                | 1.1                 | 1560.7            | 17877                       |                             |
| NYRNHFVTIL                                 | GTIQGEQPGFINK                  | 1.00                             | 58.9                | -0.3                | 1503.7            | 87082                       |                             |
| NYRNHFVTIL                                 | GTIQGEQPGFINK                  | 1.00                             | 53.3                | 0.4                 | 1503.7            | 87082                       |                             |
| FRNAEFLQAY                                 | GVAIADGPLK                     | 0.82                             | 38.6                | -0.2                | 1055.6            | 17875                       |                             |

**Table S3. Cont.**

| Nonprime sequence (inferred from database) | Prime-side sequence (LC-MS/MS) | PeptideProphet probability score | X!Tandem hyperscore | Mass accuracy (ppm) | Neutral mass (Da) | Exemplary protein accession | Discarded from PICS profile |
|--------------------------------------------|--------------------------------|----------------------------------|---------------------|---------------------|-------------------|-----------------------------|-----------------------------|
| KARGITINTS                                 | HVEYDTPTR                      | 0.81                             | 33.2                | -2.9                | 1204.5            | 17897                       |                             |
| KARGITINTS                                 | HVEYDTPTR                      | 0.97                             | 33.2                | -1.6                | 1204.5            | 17897                       |                             |
| WDFRLPRVKS                                 | ISASGHK                        | 0.65                             | 23.5                | -1.6                | 814.4             | 17877                       |                             |
| WDFRLPRVKS                                 | ISASGHK                        | 0.70                             | 26.8                | -1.6                | 814.4             | 17877                       |                             |
| KNPQKNLYTF                                 | KNQASNDLPN                     | 1.00                             | 26.9                | -1.6                | 1215.6            | 87082                       |                             |
| KNPQKNLYTF                                 | KNQASNDLPN                     | 1.00                             | 30.1                | -2.0                | 1215.6            | 87082                       |                             |
| GEIEFWFAMI                                 | KVTTIIVM                       | 0.73                             | 20                  | 3.1                 | 1019.6            | 48994                       |                             |
| NLKAMYSIAK                                 | KYDIPVVMDSAR                   | 1.00                             | 38.9                | 1.7                 | 1508.7            | 87082                       | X                           |
| NLKAMYSIAK                                 | KYDIPVVMDSAR                   | 0.97                             | 33.7                | -1.4                | 1508.7            | 87082                       | X                           |
| GETEDATIAD                                 | LAVGTAAGQIK                    | 0.89                             | 37.1                | -0.1                | 1143.6            | 17891                       |                             |
| GETEDATIAD                                 | LAVGTAAGQIK                    | 1.00                             | 41.2                | -0.5                | 1143.6            | 17891                       |                             |
| DLRCVNMVAD                                 | LWHAPAPK                       | 0.82                             | 32.4                | -1.5                | 1034.5            | 17877                       |                             |
| DLRCVNMVAD                                 | LWHAPAPK                       | 0.91                             | 30                  | 1.9                 | 1034.5            | 17877                       |                             |
| TNTIGSSEAC                                 | MLGGMAMK                       | 1.00                             | 42                  | -0.8                | 953.4             | 17877                       |                             |
| TNTIGSSEAC                                 | MLGGMAMK                       | 1.00                             | 38.7                | 0.5                 | 953.4             | 17877                       |                             |
| AELDDIFSVQ                                 | NLMHPAYK                       | 0.98                             | 32.4                | -1.6                | 1088.5            | 87082                       |                             |
| AELDDIFSVQ                                 | NLMHPAYK                       | 0.93                             | 38.8                | -1.7                | 1088.5            | 87082                       |                             |
| ALNMIDYGLD                                 | NLPGGPL                        | 0.68                             | 26.4                | -2.2                | 754.4             | 17890                       |                             |
| GLEEIGVVCQ                                 | QAGGHAAFVDAGK                  | 1.00                             | 78.5                | -1.8                | 1343.6            | 87082                       |                             |
| GLEEIGVVCQ                                 | QAGGHAAFVDAGK                  | 1.00                             | 77.7                | -1.1                | 1343.6            | 87082                       |                             |
| DGLEEIGVVC                                 | QQAGGHAAFVDAGK                 | 1.00                             | 86.9                | -0.8                | 1471.7            | 87082                       |                             |
| DGLEEIGVVC                                 | QQAGGHAAFVDAGK                 | 1.00                             | 86.9                | -0.5                | 1471.7            | 87082                       |                             |
| GLKQCKANPW                                 | QQFAETHNK                      | 1.00                             | 44.5                | -0.7                | 1217.5            | 17871                       |                             |
| GLKQCKANPW                                 | QQFAETHNK                      | 0.98                             | 39.3                | -0.8                | 1217.5            | 17871                       |                             |
| EHDPMI WAT                                 | QSSTLVEVLAK                    | 0.93                             | 35.3                | 0.2                 | 1289.7            | 17903                       |                             |
| EHDPMI WAT                                 | QSSTLVEVLAK                    | 0.97                             | 39.3                | -2.2                | 1289.7            | 17903                       |                             |
| AESVKNIFGY                                 | QYTIPTHQGR                     | 1.00                             | 46.3                | -1.7                | 1287.6            | 87082                       |                             |
| AESVKNIFGY                                 | QYTIPTHQGR                     | 1.00                             | 46.3                | -1.0                | 1287.6            | 87082                       |                             |
| PYIVATITSN                                 | SAGGQPVSLANLK                  | 0.94                             | 35.1                | 0.3                 | 1356.7            | 87082                       |                             |
| PYIVATITSN                                 | SAGGQPVSLANLK                  | 1.00                             | 42                  | -2.4                | 1356.7            | 87082                       |                             |
| ARLMATMKEA                                 | SAGKLVK                        | 0.98                             | 32.7                | 0.2                 | 845.5             | 17904                       |                             |
| YAGQDIVSNA                                 | SCTTNCLAPLAK                   | 1.00                             | 45.4                | -6.1                | 1450.7            | 17880                       |                             |
| RKIKAAQYVA                                 | SHPGEVCPAK                     | 0.99                             | 43.7                | -0.6                | 1196.5            | 17868                       |                             |
| RKIKAAQYVA                                 | SHPGEVCPAK                     | 1.00                             | 38.5                | -0.8                | 1196.5            | 17868                       |                             |
| RKIKAAQYVA                                 | SHPGEVCPAK                     | 1.00                             | 47.8                | -0.8                | 1196.5            | 17868                       |                             |
| PFACIAAGIA                                 | SLWGPAHGGANEAAK                | 0.96                             | 39.7                | 1.3                 | 1693.8            | 17869                       |                             |
| PFACIAAGIA                                 | SLWGPAHGGANEAAK                | 0.97                             | 43.9                | -1.7                | 1693.8            | 17869                       |                             |
| HDPMEI WATQ                                | SSTLVEVLAK                     | 0.95                             | 35.2                | -0.8                | 1161.6            | 17903                       |                             |
| HDPMEI WATQ                                | SSTLVEVLAK                     | 0.99                             | 38.2                | 0.0                 | 1161.6            | 17903                       |                             |
| RTMACGIAGL                                 | SVAADSLSAIK                    | 1.00                             | 56.7                | -0.1                | 1176.6            | 17871                       |                             |
| RTMACGIAGL                                 | SVAADSLSAIK                    | 1.00                             | 65.1                | 4.3                 | 1176.6            | 17871                       |                             |
| RTMACGIAGL                                 | SVAADSLSAIK                    | 1.00                             | 50.7                | -5.6                | 1176.6            | 17871                       |                             |
| CKKNPQKNLY                                 | TFKNQASNDLPN                   | 1.00                             | 29.6                | -0.6                | 1463.7            | 87082                       |                             |
| CKKNPQKNLY                                 | TFKNQASNDLPN                   | 0.98                             | 26.7                | 1.4                 | 1463.7            | 87082                       |                             |
| KEASAGKLVK                                 | TLAAVRDAKEAA                   | 0.99                             | 38.5                | -0.6                | 1330.7            | 17904                       | X                           |
| KEASAGKLVK                                 | TLAAVRDAKEAA                   | 0.99                             | 43.5                | -1.0                | 1330.7            | 17904                       | X                           |
| KEASAGKLVK                                 | TLAAVRDAKEAA                   | 0.99                             | 35.7                | -0.8                | 1330.7            | 17904                       | X                           |
| KEASAGKLVK                                 | TLAAVRDAKEAA                   | 0.97                             | 34.6                | 0.1                 | 1330.7            | 17904                       | X                           |
| EEKARGITIN                                 | TSHVEYDTPTR                    | 1.00                             | 46.4                | 0.9                 | 1392.6            | 17897                       |                             |
| EEKARGITIN                                 | TSHVEYDTPTR                    | 1.00                             | 46.3                | -1.4                | 1392.6            | 17897                       |                             |
| TTGEHEVSFQ                                 | VHSEVFAK                       | 0.83                             | 27.9                | -0.7                | 1031.5            | 17906                       |                             |
| QQAVAAHKFN                                 | VLASQPADFDR                    | 0.81                             | 25.5                | -0.7                | 1305.6            | 17901                       |                             |
| PDEAVAIGAA                                 | VQGGVLTGDVK                    | 0.99                             | 40.8                | -0.2                | 1187.6            | 17861                       |                             |
| PDEAVAIGAA                                 | VQGGVLTGDVK                    | 0.99                             | 46.6                | -1.8                | 1187.6            | 17861                       |                             |
| MVMPGDNIK                                  | VVTLIHPI                       | 0.83                             | 26.1                | 0.3                 | 978.6             | 17897                       |                             |
| MVMPGDNIK                                  | VVTLIHPI                       | 0.99                             | 29.7                | -1.4                | 978.6             | 17897                       |                             |

Nonprime-side sequences are reported up to the position P10. X denotes ambiguous nonprime side residues. A small number of cleavage sites have P1 residues, which correspond to a potential cleavage-site of the digestion protease used for library generation. These cases might be related to incomplete amine protection during library preparation. Hence, prime-side cleavage products with such amino-termini are omitted from the PICS analysis, as well as prime-side cleavage products with amino termini that correspond to a protein amino terminus. One exemplary protein is stated for each identified peptide sequence. X! Tandem was applied to assign peptides to tandem mass spectra and the X!Tandem hyperscore is reported together with the PeptideProphet probability score. C signifies carboxyamidomethylated cysteine and K signifies di-methylated lysine. Some peptides were identified repeatedly by LC-MS/MS; however, the set of sequences was rendered nonredundant before analysis in the form of sequence logs.
